# Supplementary material
Source: PubMed Central journal article supplement (PMC2676044)

## FIGURE LEGENDS

**Supplementary figure 1. Cryptic splice variant of *lin9* transcript evoked by MO-E1.** (A) Schematic representation of the cryptic splice product (red). Artificial acceptor and donor sites of Intron 1 (green) are indicated. (B) Sequence of *lin9* pre-mRNA Intron 1. Uppercase letters indicate the information that is retained in the cryptic variant.

**Supplementary figure 2. Increase of apoptotic and mitotic cell numbers in the optic tectum of LIN9 morphant embryos.** Confocal images were taken of Hoechst stained embryos 30 hpf as indicated (dorsal view).

**Supplementary figure 3. Summary of genes that were deregulated  $\geq 1.6$  fold in E1 compared to E1mis (control) morphants.** (A) Downregulated genes. (B) Upregulated genes.

**Supplementary figure 4. Expression analysis of the apoptosis-related genes *tnfb* and *bax* in *lin9* morphants.** RT-qPCR analysis 24 hpf revealed that transcript levels of the p53 target gene *bax* are unaltered, whereas *tnfb* is upregulated upon loss of *lin9*.

# Supplementary figure 1

A

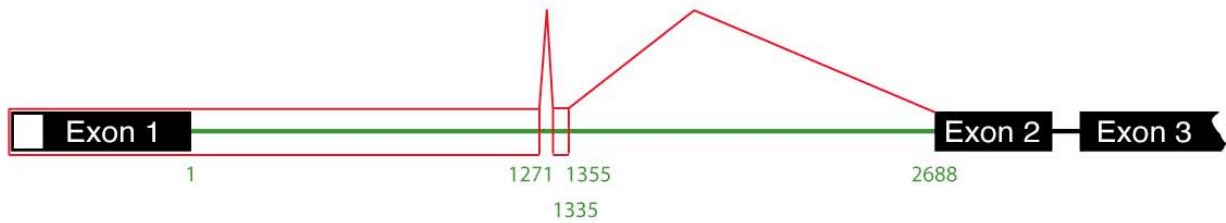

B

```
1 GTGAGTAATAAACTAACTCCTCGCTAAACCTTGAAAAATCCCCCTGAGTGTTTGTGCGGTTTAAACGTTTCATAAGGCGTGCTATTGCGCGTACAT
101 TTCAGGTGCTTTTCATTGTTTGTACTGGTGTAAAATAGACGCAAAAGTATTAGCGCTGAGGCTAACAGCTAACAGTGTAGCTTTCAAAGCCTACTACTA
201 TAAATAAATATCGCACCTGAAGAGTTTTTCGCCTTAAAGTTTCGTATGGTGCTTTGTTTATAATCAAATAATTTAATTACTGGTTGCGGTTTCGCA
301 GTGTTTACTATGAAAAGGGTTAACTTTTATACATTTACAGGGTCTAACTCGATGACAGCTGCTGGGTTTGTGTTCTTGTGAGTGTGAGTTTATT
401 TGTGTACTAAAACACTGTCGGTATGATAAACACATACTTTAATATGCTGAAACACTCTTCAGGTGTGAAAATGCGCTCTTGTATGATGACGACTTGT
501 GTCTGGATAATTCTCATTATCACAATAATTCACAGTGATTTTTTTCTTCGGTCTTACCGAAAGCTTTGTTTTGATTGATTAATAGGGATAATTGCGT
601 AATCCGTGCTGTTATCTTGCTTATAATTACTTTTAAATTTGAGCAGCTTATAATTGCAGAAAGATTATTTATTTCTAGCTTTGCTTTATT
701 TAAAGTATCAAAAATAAAAACATATTACAGCTTTTTTCACTGAACAATAAAACGTCCTGCTAAATTTAAGCATAAAAAAGGCTATCATACTTTTAA
801 CAAGGATTATCAGAAGTAACCACTAAAATCTTATTGGTGAACAATAGTTTATCTCATCAGGCTTAGATCAAGAATCATATGATGTCATTATTCAGAA
901 CAATTAAGAATGGCTGTGACGCTCTTTAAATACTAATTTTCATTTTAAATCTTTATATTTTAGTTTTATTTTAAACACACATTGTTGATCAA
1001 CAGAAGGTTCAAACATTCTACAATGAAATGAAATTAAGTTAATAGCACATCATTTTATGAGTACAGGTGAGAATGTTGTGTTAAATTAATAAAATGT
1101 AAAAAGGGCATTAAATAAAAAAGGCTATTTTTCAGCTGCAACCCATCACTGGGAAGCACCCATACACACTCATTACACACATACACTACGAACAATTC
1201 AAGGTACCCCAATTCACCTATAGCGCATGCTTCGGAGTGTAGGGTAAAACGGAGCACCCGGAGGAAACccacggaactggggaacatgcaact
1301 ccacacagaatgccaactgatccagccaaggctCGAACCGCAACCTTTTGTGtgaggcctatctttcatttaaatctttatattgtaactttta
1401 atttcaaacacatctttttgtcaacagaagtttaaaataatctaaataaataaagtttgatagcacataatataagactcaggtcaga
1501 atgtagtatgatatttaattagaacttaaaatgcctcttaagtagaccattttcaaccatattttgatattttacttaagttatttaagcat
1601 taaagtcagtctttctctattatataagtcagttagggtgttttttttaacaataagtagtgttgaaaaactgacagtcgattctttttttta
1701 aatcttcttttagtagaattttctacagtagtcaagtcagctttgtgtcaattcaaccacatgtacaggacatatagagaattaatattgcgttac
1801 tctcagaccctggtgcctaacatataatattttacaaaaagataattttagaagaatacaataaatacaattgctcatttaaaactgaaaata
1901 taagtaaaaaataaaattgttaaacacacaaattacacttaagggcacatgagttgtgcagatgcaaacagtatactgtgcaaaaagatgataataa
2001 aaaacataataatacaatacaagatgtttttataaagcaatttaaaaaaaccaatgtgtcaaaagtgctgatataggattactaaagacagagatga
2101 gaataaagtggaattgaaacaatttaataaataaaagcaataaaagcatcaaggagatttaaaaaatagataggagcaattgcaaatgcttgatcac
2201 ctctgtttgttaagcatgtttatgaagttgatctatcaactcactaagttaaaaataaaaacattcaagctttcctattcttgggttcagctgaaa
2301 gggcatccagtttgtaaaaacatagccggaatagttggcggttcattccgctgtggcgacccctgataaataagggagtaaacgaaagaaaataataa
2401 atgaataaagaagcgtaaattctttgtttttgttttttttaagcaactttaaatgtaaacacacagtgtaaccaccactttatattgccc
2501 ttggggctgaactattgtaataaccatgcactaaaaccctttaatctgctgataatcggactttactcagttgcatattgatattcaagattt
2601 gttttgtttggacttctaatcatatgttgcttttgaactgtaagtattgtaataatcaaacctttgttctcttcgcttcag
```

Supplementary figure 2

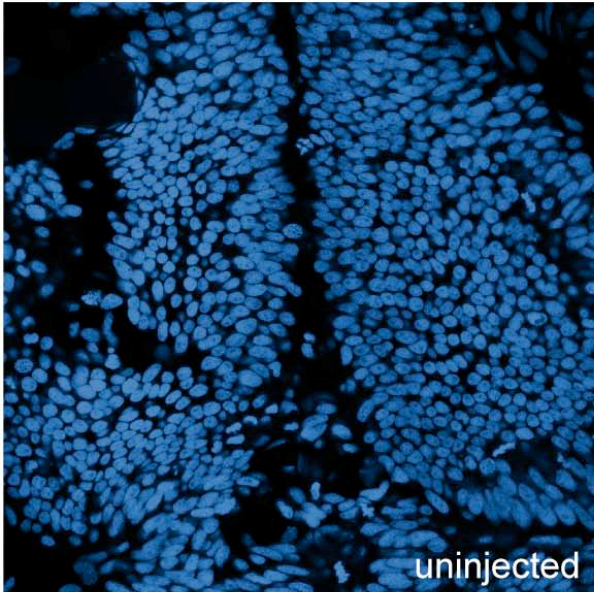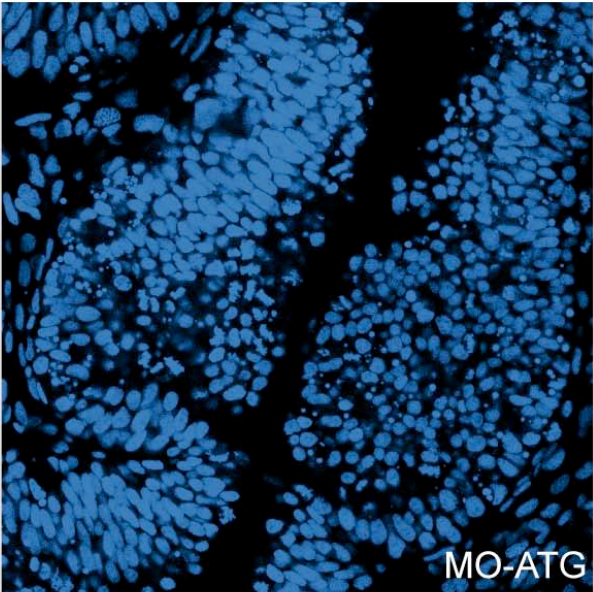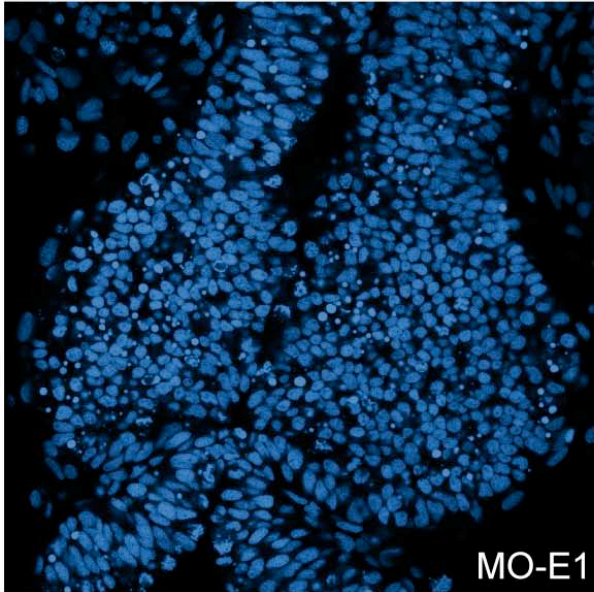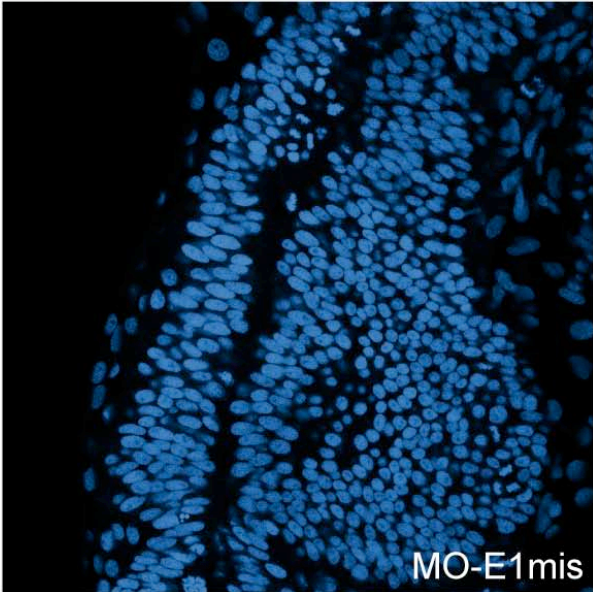

Supplementary figure 3

A

zgc:56161  
 LOC402879  
 zgc:136263  
 zgc:158222  
 TC356740  
 ENSDART00000105631  
 rdbp  
 lin9  
 im:7137135  
 TC306331  
 si:dkkey-94n12.2  
 LOC567658  
 sass6  
 kifc1  
 tuba1  
 zgc:92153  
 cdc20  
 LOC567446  
 B1326267  
 hmnr  
 ccn1  
 zgc:92020  
 ENSDART00000021089  
 cyp51  
 zgc:158222  
 LOC561143  
 tacc3  
 zgc:92339  
 wu:fj40d12  
 kif11  
 BC150401  
 top2a  
 zgc:91796  
 zgc:55664  
 EH513764  
 gpsm2  
 zgc:123190  
 epd  
 si:dkkey-85n7.5  
 ik.tdsbuc\_2d11  
 TC363049  
 zgc:153154  
 ENSDART00000085742  
 cdc2  
 zgc:55664  
 LOC799087  
 LOC562517  
 exosc4  
 ccng1  
 im:7144435  
 TC357954  
 zgc:123049  
 pflfb3  
 zgc:110002  
 LOC796178  
 zgc:92218  
 TC324722  
 TC331971  
 CO350290  
 kpna2  
 zgc:101826  
 zgc:153062  
 tuba8l  
 cyp1a  
 ccng1  
 LOC572136  
 ENSDART00000100818  
 ptgs2b  
 TC357170  
 cdc14a  
 TC362508  
 si:busm1-234g15.1  
 si:dkkey-85n7.5  
 np  
 rock2a  
 zgc:92434  
 AA566793  
 zgc:113277  
 LOC573469  
 zgc:92420  
 gngt2  
 TC319053  
 fabp1a  
 TC353933  
 bscv  
 CK029523  
 sfard10  
 kif23  
 zgc:77001  
 gpsm2  
 TC341224  
 rcv1  
 zgc:162935  
 TC306740  
 CT659012  
 zgc:136896  
 LOC568219  
 hsd3b1  
 zgc:153382  
 BC091922  
 ENSDART00000052992  
 CN018533  
 zgc:152925  
 slc25a28  
 si:dkkey-117h8.4  
 jmjdb  
 LOC562883  
 LOC797617  
 zgc:64213

B

TC364829  
 BC142784  
 TC340632  
 CT704749  
 tnfb  
 plekhf1  
 lsm14a  
 cyp11a1  
 CK028897  
 zgc:101886  
 DN893839  
 zgc:114142  
 sass6  
 TC344354  
 pvalb1  
 zgc:56486  
 hpx  
 zgc:100806  
 TC324513  
 zgc:64119  
 abi1  
 zgc:154142  
 ENSDART00000099383  
 slc40a1  
 IL-15\_3  
 CT617066  
 zgc:152945  
 cno18  
 CT633450  
 LOC100007711  
 LOC100007236  
 LOC564868  
 EE707177  
 dnajb1  
 zgc:110682  
 entpd3  
 DKEY-241L7.8  
 ENSDART00000106082  
 anxa13  
 zgc:92041  
 ENSDART00000097325  
 LOC567285  
 EH516139  
 rtn4a  
 TC351142  
 zgc:123250  
 CT728813  
 TC312939  
 LOC556837

Supplementary figure 4

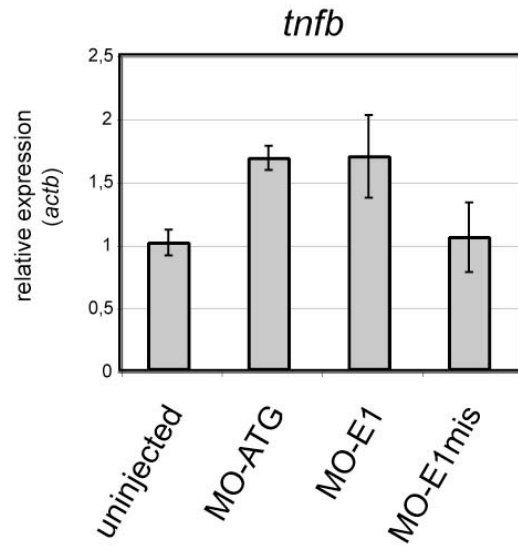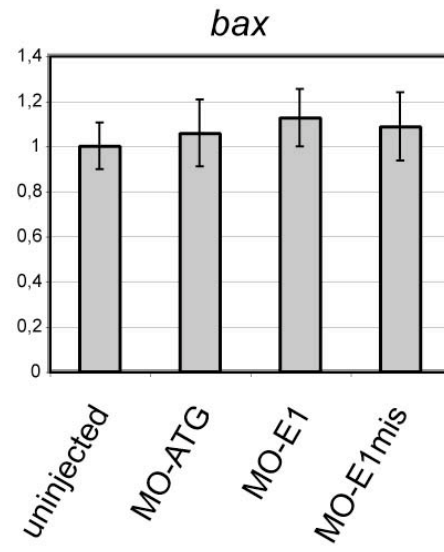

Supplement: M809635200_1.pdf [file M809635200_1.pdf]
